# Supplementary material for: Impact of Three to Five Rounds of Mass Drug Administration on Schistosomiasis and Soil-Transmitted Helminths in School-Aged Children in North-Central Nigeria
Source: PubMed Central journal article supplement (PMC9294711; doi:10.4269/ajtmh.21-1207), 2022-05-16
Supplement: tpmd211207.SD1.pdf [file tpmd211207.SD1.pdf]

## Proposed supplemental materials

| State    | LGA            | 2012 | 2013 | 2014 | 2015 | 2016 | 2017 | 2018 |
|----------|----------------|------|------|------|------|------|------|------|
| Nasarawa | Akwanga        | ●●●○ | ●●○  | ●●○  | ○●○  | ●●○  | ○●○  | ●●○  |
|          | Awe            | ●●●○ | ●●○  | ●●○  | ○●○  | ○●○  | ○●○  | ○●○  |
|          | Doma           | ●●●○ | ●●○  | ●●○  | ○●○  | ○●○  | ○●○  | ○●○  |
|          | Karu           | ●●●○ | ●●○  | ●●○  | ○●○  | ○●○  | ○●○  | ○●○  |
|          | Keana          | ●●○  | ●●○  | ●●○  | ○●○  | ○●○  | ○●○  | ○●○  |
|          | Keffi          | ●●○  | ●●○  | ●●○  | ○●○  | ○●○  | ○●○  | ○●○  |
|          | Kokona         | ●●●○ | ●●○  | ●●○  | ○●○  | ○●○  | ○●○  | ○●○  |
|          | Lafia          | ●●●○ | ●●○  | ●●○  | ○●○  | ○●○  | ○●○  | ○●○  |
|          | Nasarawa       | ●●●○ | ●●○  | ●●○  | ○●○  | ○●○  | ○●○  | ○●○  |
|          | Nasarawa Eggon | ●●●○ | ●●○  | ●●○  | ○●○  | ○●○  | ○●○  | ○●○  |
|          | Obi            | ●●●○ | ●●○  | ●●○  | ○●○  | ○●○  | ○●○  | ○●○  |
| Toto     | ●●●○           | ●●○  | ●●○  | ○●○  | ○●○  | ○●○  | ○●○  |      |
| Wamba    | ●●●○           | ●●○  | ●●○  | ○●○  | ○●○  | ○●○  | ○●○  |      |
| Plateau  | Barkin Ladi    | ○●○  | ●●○  | ●●○  | ○●○  | ○●○  | ○●○  | ○●○  |
|          | Bassa          | ●●●○ | ●●○  | ●●○  | ○●○  | ○●○  | ○●○  | ○●○  |
|          | Bokkos         | ●●●○ | ●●○  | ●●○  | ○●○  | ○●○  | ○●○  | ○●○  |
|          | Jos East       | ●●●○ | ●●○  | ●●○  | ○●○  | ○●○  | ○●○  | ○●○  |
|          | Jos North      | ○●○  | ●●○  | ●●○  | ○●○  | ○●○  | ○●○  | ○●○  |
|          | Jos South      | ○●○  | ●●○  | ●●○  | ○●○  | ○●○  | ○●○  | ○●○  |
|          | Kanam          | ○●○  | ●●○  | ●●○  | ○●○  | ○●○  | ○●○  | ○●○  |
|          | Kanke          | ●●●○ | ●●○  | ●●○  | ○●○  | ○●○  | ○●○  | ○●○  |
|          | Langtang North | ○●○  | ●●○  | ●●○  | ○●○  | ○●○  | ○●○  | ○●○  |
|          | Langtang South | ●●●○ | ●●○  | ●●○  | ○●○  | ○●○  | ○●○  | ○●○  |
|          | Mangu          | ○●○  | ●●○  | ●●○  | ○●○  | ○●○  | ○●○  | ○●○  |
|          | Mikang         | ●●●○ | ●●○  | ●●○  | ○●○  | ○●○  | ○●○  | ○●○  |
|          | Pankshin       | ●●●○ | ●●○  | ●●○  | ○●○  | ○●○  | ○●○  | ○●○  |
|          | Qua'an Pan     | ○●○  | ●●○  | ●●○  | ○●○  | ○●○  | ○●○  | ○●○  |
|          | Riyom          | ○●○  | ●●○  | ●●○  | ○●○  | ○●○  | ○●○  | ○●○  |
| Shendam  | ●●●○           | ●●○  | ●●○  | ○●○  | ○●○  | ○●○  | ○●○  |      |
| Wase     | ○●○            | ●●○  | ●●○  | ○●○  | ○●○  | ○●○  | ○●○  |      |

**KEY:**  
 ALB ●  
 IVM ●  
 MEB ●  
 PZQ ●  
 None ○

Supplemental Figure 1: Treatment history of 30 LGAs in Nasarawa and Plateau states, Nigeria, beginning the year before the survey (2012) and continuing through the year of the survey.

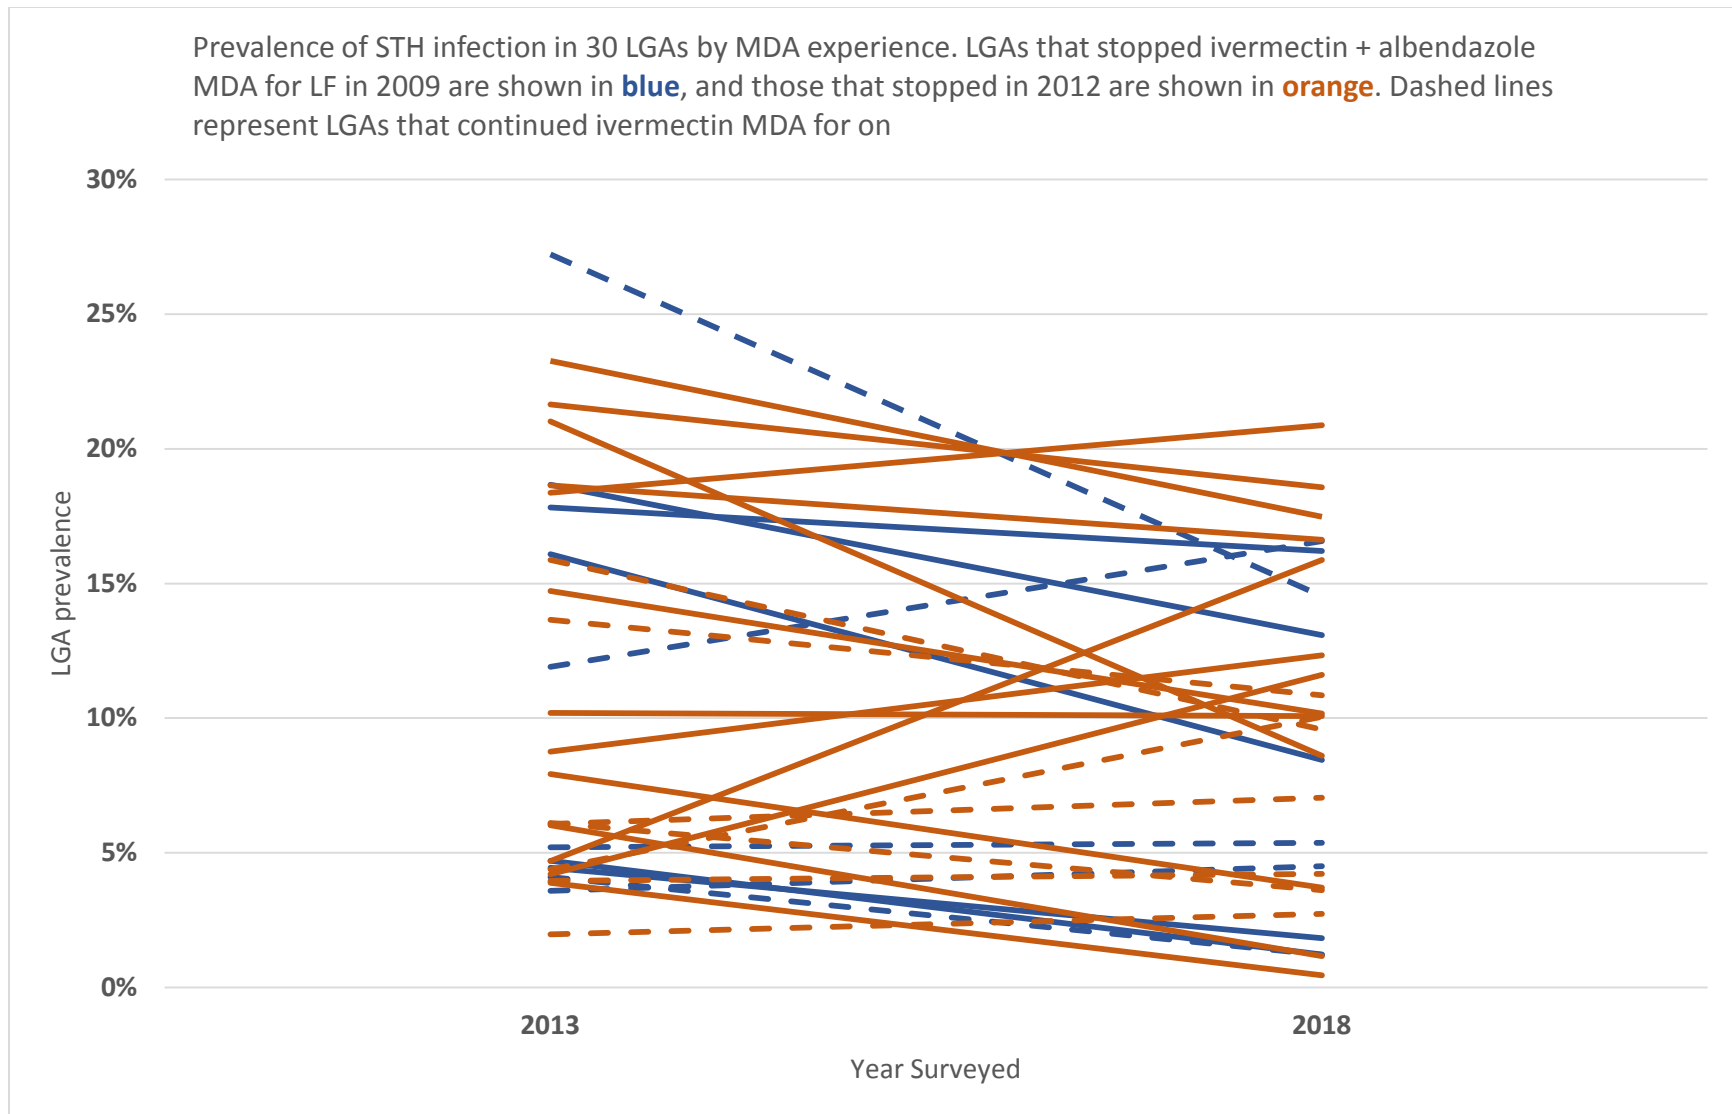

Supplemental Figure 2: Prevalence of STH infection in 30 LGAs, 2013 and 2018, categorized by exposure to MDA with ivermectin or ivermectin + albendazole.

Supplemental Table 1: Change in schistosomiasis prevalence by LGA from 2013 to 2018, both all infections and heavy infections only.

| State-LGA       | <i>S. haematobium</i> prevalence |             | Prevalence of heavy-intensity <i>S. haematobium</i> infection |             | <i>S. mansoni</i> prevalence |             | Prevalence of heavy-intensity <i>S. mansoni</i> infection |             |
|-----------------|----------------------------------|-------------|---------------------------------------------------------------|-------------|------------------------------|-------------|-----------------------------------------------------------|-------------|
|                 | 2013                             | 2018        | 2013                                                          | 2018        | 2013                         | 2018        | 2013                                                      | 2018        |
| <b>Nasarawa</b> | <b>12.1%</b>                     | <b>7.1%</b> | <b>Not done</b>                                               | <b>0.6%</b> | <b>3.5%</b>                  | <b>3.9%</b> | <b>0.1%</b>                                               | <b>0.4%</b> |
| Akwanga         | 10.3%                            | 4.5%        |                                                               | 0.5%        | 3.3%                         | 3.3%        | 0.0%                                                      | 0.2%        |
| Awe             | 25.8%                            | 19.9%       |                                                               | 3.3%        | 0.3%                         | 0.0%        | 0.0%                                                      | 0.0%        |
| Doma            | 17.5%                            | 14.4%       |                                                               | 1.4%        | 0.0%                         | 0.7%        | 0.0%                                                      | 0.0%        |
| Karu            | 16.1%                            | 6.7%        |                                                               | 0.0%        | 10.2%                        | 19.5%       | 0.2%                                                      | 3.6%        |
| Keana           | 32.3%                            | 0.9%        |                                                               | 0.0%        | 0.3%                         | 0.0%        | 0.0%                                                      | 0.0%        |
| Keffi           | 11.9%                            | 6.3%        |                                                               | 0.0%        | 2.9%                         | 2.6%        | 0.0%                                                      | 0.0%        |
| Kokona          | 8.3%                             | 6.1%        |                                                               | 0.3%        | 2.8%                         | 1.5%        | 0.0%                                                      | 0.0%        |
| Lafia           | 8.6%                             | 7.8%        |                                                               | 0.5%        | 3.6%                         | 1.7%        | 0.0%                                                      | 0.0%        |
| Nasarawa        | 19.8%                            | 21.1%       |                                                               | 2.5%        | 4.8%                         | 0.8%        | 0.3%                                                      | 0.0%        |
| Nasarawa        |                                  |             |                                                               |             |                              |             |                                                           |             |
| Egon            | 2.7%                             | 2.6%        |                                                               | 0.0%        | 2.0%                         | 2.3%        | 0.0%                                                      | 0.0%        |
| Obi             | 3.8%                             | 4.5%        |                                                               | 0.3%        | 0.7%                         | 0.0%        | 0.2%                                                      | 0.0%        |
| Toto            | 7.6%                             | 6.9%        |                                                               | 1.1%        | 0.8%                         | 0.0%        | 0.0%                                                      | 0.0%        |
| Wamba           | 1.0%                             | 2.7%        |                                                               | 0.0%        | 11.9%                        | 7.3%        | 0.3%                                                      | 0.3%        |
| <b>Plateau</b>  | <b>5.6%</b>                      | <b>3.6%</b> | <b>Not done</b>                                               | <b>0.6%</b> | <b>6.2%</b>                  | <b>4.6%</b> | <b>1.3%</b>                                               | <b>0.3%</b> |
| Barkin Ladi     | 0.5%                             | 0.0%        |                                                               | 0.0%        | 7.4%                         | 0.4%        | 0.0%                                                      | 0.0%        |
| Bassa           | 1.5%                             | 0.9%        |                                                               | 0.0%        | 12.9%                        | 16.4%       | 0.8%                                                      | 1.2%        |
| Bokkos          | 0.5%                             | 0.9%        |                                                               | 0.8%        | 8.0%                         | 6.6%        | 1.6%                                                      | 0.8%        |
| Jos East        | 0.8%                             | 2.0%        |                                                               | 0.4%        | 5.4%                         | 3.3%        | 0.3%                                                      | 0.0%        |
| Jos North       | 0.6%                             | 1.8%        |                                                               | 0.0%        | 5.8%                         | 8.6%        | 0.9%                                                      | 0.3%        |
| Jos South       | 1.8%                             | 0.4%        |                                                               | 0.0%        | 10.3%                        | 3.5%        | 1.3%                                                      | 0.0%        |
| Kanam           | 14.9%                            | 12.9%       |                                                               | 5.0%        | 0.2%                         | 0.8%        | 0.2%                                                      | 0.0%        |
| Kanke           | 2.5%                             | 1.7%        |                                                               | 0.0%        | 1.3%                         | 2.0%        | 0.2%                                                      | 0.0%        |
| Langtang        |                                  |             |                                                               |             |                              |             |                                                           |             |
| North           | 20.7%                            | 13.0%       |                                                               | 2.6%        | 1.0%                         | 1.3%        | 1.0%                                                      | 0.0%        |
| Langtang        | 1.9%                             | 0.8%        |                                                               | 0.0%        | 0.3%                         | 0.5%        | 0.0%                                                      | 0.0%        |

| State-LGA  | <i>S. haematobium</i> prevalence |       | Prevalence of heavy-intensity <i>S. haematobium</i> infection |      | <i>S. mansoni</i> prevalence |      | Prevalence of heavy-intensity <i>S. mansoni</i> infection |      |
|------------|----------------------------------|-------|---------------------------------------------------------------|------|------------------------------|------|-----------------------------------------------------------|------|
|            | 2013                             | 2018  | 2013                                                          | 2018 | 2013                         | 2018 | 2013                                                      | 2018 |
| South      |                                  |       |                                                               |      |                              |      |                                                           |      |
| Mangu      | 1.0%                             | 0.9%  |                                                               | 0.0% | 7.6%                         | 0.9% | 1.7%                                                      | 0.0% |
| Mikang     | 7.0%                             | 3.5%  |                                                               | 0.0% | 5.8%                         | 0.5% | 0.0%                                                      | 0.0% |
| Pankshin   | 0.5%                             | 1.2%  |                                                               | 0.0% | 17.8%                        | 8.2% | 10.2%                                                     | 0.0% |
| Qua'an Pan | 3.3%                             | 2.6%  |                                                               | 0.0% | 0.3%                         | 1.5% | 0.0%                                                      | 0.0% |
| Riyom      | 0.0%                             | 0.6%  |                                                               | 0.0% | 16.9%                        | 9.4% | 5.0%                                                      | 0.6% |
| Shendam    | 16.4%                            | 0.9%  |                                                               | 0.0% | 4.5%                         | 3.2% | 0.0%                                                      | 0.6% |
| Wase       | 21.0%                            | 13.2% |                                                               | 0.8% | 1.2%                         | 6.6% | 0.9%                                                      | 0.5% |

# Schisto School Form 1

River Blindness Nigeria 2017

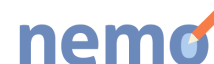

|                                                                                                                                            |                                                                                                                                                                                                                                                                                                                                                                                                                                                                                                                                          |
|--------------------------------------------------------------------------------------------------------------------------------------------|------------------------------------------------------------------------------------------------------------------------------------------------------------------------------------------------------------------------------------------------------------------------------------------------------------------------------------------------------------------------------------------------------------------------------------------------------------------------------------------------------------------------------------------|
| User/Team                                                                                                                                  |                                                                                                                                                                                                                                                                                                                                                                                                                                                                                                                                          |
| Observation time                                                                                                                           |                                                                                                                                                                                                                                                                                                                                                                                                                                                                                                                                          |
| 1. Form start time                                                                                                                         |                                                                                                                                                                                                                                                                                                                                                                                                                                                                                                                                          |
| 2. School                                                                                                                                  |                                                                                                                                                                                                                                                                                                                                                                                                                                                                                                                                          |
| 2.1. *Choose a state, LGA, and school.<br><i>If the wrong options appear, you may have chosen incorrectly in the previous box.</i>         | <b>Select One:</b><br><input type="checkbox"/> Nasarawa <input type="checkbox"/> Plateau                                                                                                                                                                                                                                                                                                                                                                                                                                                 |
| 3. Students                                                                                                                                |                                                                                                                                                                                                                                                                                                                                                                                                                                                                                                                                          |
| 3.1. Number of females enrolled in this school.                                                                                            |                                                                                                                                                                                                                                                                                                                                                                                                                                                                                                                                          |
| 3.2. Number of males enrolled in this school.                                                                                              |                                                                                                                                                                                                                                                                                                                                                                                                                                                                                                                                          |
| 3.3. Number of students sampled.<br><i>Must not be above 60.</i>                                                                           |                                                                                                                                                                                                                                                                                                                                                                                                                                                                                                                                          |
| 4. Water in school                                                                                                                         |                                                                                                                                                                                                                                                                                                                                                                                                                                                                                                                                          |
| 4.1. Is there a source of drinking water in the school?<br><i>Choose even if the source is not functioning - that will be asked later.</i> | <b>Select One:</b><br><input type="checkbox"/> Yes <input type="checkbox"/> No                                                                                                                                                                                                                                                                                                                                                                                                                                                           |
| <b>ANSWER ONLY IF Question #4.1 is equal to "Yes"</b>                                                                                      |                                                                                                                                                                                                                                                                                                                                                                                                                                                                                                                                          |
| 4.2. What type(s) of water source(s)?                                                                                                      | <b>Select Multiple:</b><br><input type="checkbox"/> Unprotected spring <input type="checkbox"/> Protected spring<br><input type="checkbox"/> Unprotected dug well <input type="checkbox"/> Protected dug well<br><input type="checkbox"/> Hand pump/tube well/borehole<br><input type="checkbox"/> Surface water (river, dam, lake, stream, etc)<br><input type="checkbox"/> Public piped water/tap/standpipe <input type="checkbox"/> Rainwater collection<br><input type="checkbox"/> Sachet/Pure water <input type="checkbox"/> Other |
| <b>ANSWER ONLY IF Question #4.2 includes "Other"</b>                                                                                       |                                                                                                                                                                                                                                                                                                                                                                                                                                                                                                                                          |
| 4.3. Specify "other" source of water.                                                                                                      |                                                                                                                                                                                                                                                                                                                                                                                                                                                                                                                                          |
| <b>ANSWER ONLY IF Question #4.1 is equal to "Yes"</b>                                                                                      |                                                                                                                                                                                                                                                                                                                                                                                                                                                                                                                                          |
| 4.4. Is the water source functional?                                                                                                       | <b>Select One:</b><br><input type="checkbox"/> Yes <input type="checkbox"/> No                                                                                                                                                                                                                                                                                                                                                                                                                                                           |
| <b>ANSWER ONLY IF Question #4.4 is equal to "Yes"</b>                                                                                      |                                                                                                                                                                                                                                                                                                                                                                                                                                                                                                                                          |
| 4.5. Is the water always available for all school children and staff?                                                                      | <b>Select One:</b><br><input type="checkbox"/> Yes <input type="checkbox"/> No                                                                                                                                                                                                                                                                                                                                                                                                                                                           |
| 5. Water near school                                                                                                                       |                                                                                                                                                                                                                                                                                                                                                                                                                                                                                                                                          |
| 5.1. Are there sources of drinking water close to the school?                                                                              | <b>Select One:</b><br><input type="checkbox"/> Yes <input type="checkbox"/> No                                                                                                                                                                                                                                                                                                                                                                                                                                                           |
| <b>ANSWER ONLY IF Question #5.1 is equal to "Yes"</b>                                                                                      |                                                                                                                                                                                                                                                                                                                                                                                                                                                                                                                                          |
| 5.2. What type(s) of water source(s)?                                                                                                      | <b>Select Multiple:</b><br><input type="checkbox"/> Unprotected spring <input type="checkbox"/> Protected spring<br><input type="checkbox"/> Unprotected dug well <input type="checkbox"/> Protected dug well<br><input type="checkbox"/> Hand pump/tube well/borehole<br><input type="checkbox"/> Surface water (river, dam, lake, stream, etc)<br><input type="checkbox"/> Public piped water/tap/standpipe <input type="checkbox"/> Rainwater collection<br><input type="checkbox"/> Sachet/Pure water <input type="checkbox"/> Other |
| <b>ANSWER ONLY IF Question #5.2 includes "Other"</b>                                                                                       |                                                                                                                                                                                                                                                                                                                                                                                                                                                                                                                                          |
| 5.3. Specify "other" source of drinking water close to the school.                                                                         |                                                                                                                                                                                                                                                                                                                                                                                                                                                                                                                                          |
| 5.4. Are there accessible water bodies close to the school?                                                                                | <b>Select One:</b><br><input type="checkbox"/> Yes <input type="checkbox"/> No                                                                                                                                                                                                                                                                                                                                                                                                                                                           |
| 6. Latrine                                                                                                                                 |                                                                                                                                                                                                                                                                                                                                                                                                                                                                                                                                          |
| 6.1. Is there a latrine in the school?                                                                                                     | <b>Select One:</b><br><input type="checkbox"/> Yes <input type="checkbox"/> No                                                                                                                                                                                                                                                                                                                                                                                                                                                           |
| <b>ANSWER ONLY IF Question #6.1 is equal to "Yes"</b>                                                                                      |                                                                                                                                                                                                                                                                                                                                                                                                                                                                                                                                          |
| 6.2. INTERVIEWER: Do you observe evidence of latrine usage?<br><i>Data collector must personally check.</i>                                | <b>Select One:</b><br><input type="checkbox"/> Yes <input type="checkbox"/> No                                                                                                                                                                                                                                                                                                                                                                                                                                                           |
| <b>ANSWER ONLY IF Question #6.1 is equal to "Yes"</b>                                                                                      |                                                                                                                                                                                                                                                                                                                                                                                                                                                                                                                                          |
| 6.3. What type of latrine is present?                                                                                                      | <b>Select One:</b><br><input type="checkbox"/> Pit latrine without slab <input type="checkbox"/> Pit latrine with slab<br><input type="checkbox"/> Ventilated improved pit latrine (VIP) <input type="checkbox"/> Flush or pour toilet<br><input type="checkbox"/> Other                                                                                                                                                                                                                                                                 |

**ANSWER ONLY IF Question #6.3 includes "Other"**

6.4. Specify "other" latrine type.

## 7. Latrine details

7.1. What is the condition of the latrine?

**Select One:**

- Poor (flies, odour, visible stool, etc.)
- Fair (has roof/door but dirty floor)
- Moderate (clean, absence of roof or door)
- Good (clean, odourless, no flies, roof/door)
- Excellent (clean, odourless, complete, water)

7.2. Is there a separate latrine for boys and girls?

**Select One:**

- Yes  No

7.3. Is there water or tissue for use after defecating?

**Select One:**

- Always  Sometimes  Never  Other

**ANSWER ONLY IF Question #7.3 is equal to "Other"**

7.4. Specify "other" kind of water or tissue for use after defecating.

## 8. Handwashing

8.1. Is there provision for hand washing after toilet use?

**Select One:**

- Yes  No

**ANSWER ONLY IF Question #8.1 is equal to "Yes"**

8.2. What type of hand washing facilities?

**Select One:**

- No water  Water only  Water and soap
- Water, soap, non-disposable napkin
- Water, soap, disposable napkin  Other

**ANSWER ONLY IF Question #8.2 is equal to "Other"**

8.3. Specify "other" type of hand washing facilities.

8.4. Is there a hand washing facility near where food is prepared, sold, or consumed in school?

**Select One:**

- Yes  No

## 9. Health education

9.1. Is health education taught in school?

**Select One:**

- Yes  No

9.2. Is there a health club in the school?

**Select One:**

- Yes  No

## 10. NTD program

10.1. Has there been any deworming for the children in this school?

**Select One:**

- Yes  No

10.2. Is there a NTD treatment register in the school?

**Select One:**

- Yes  No

**ANSWER ONLY IF Question #10.2 is equal to "Yes"**

10.3. INTERVIEWER: Do you observe evidence of deworming in the treatment register?

**Select One:**

- Yes  No

**ANSWER ONLY IF Question #10.2 is equal to "Yes" AND Question #10.3 is equal to "Yes"**

10.4. Indicate the number of treatment rounds completed.

11. Additional notes (optional).

12. Form end time

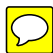

# Schisto Student Form 1

River Blindness Nigeria 2017



|                                                                                                                                                                  |                                                                                                                                                                                                                                                                                                                           |
|------------------------------------------------------------------------------------------------------------------------------------------------------------------|---------------------------------------------------------------------------------------------------------------------------------------------------------------------------------------------------------------------------------------------------------------------------------------------------------------------------|
| User/Team                                                                                                                                                        |                                                                                                                                                                                                                                                                                                                           |
| Observation Time                                                                                                                                                 |                                                                                                                                                                                                                                                                                                                           |
| 1. Form start time                                                                                                                                               |                                                                                                                                                                                                                                                                                                                           |
| 2. *Choose a state, LGA, and school.<br><i>If the wrong options appear, you may have chosen incorrectly in the previous box.</i>                                 | <b>Select One:</b><br><input type="checkbox"/> Nasarawa <input type="checkbox"/> Plateau                                                                                                                                                                                                                                  |
| 3. Students                                                                                                                                                      |                                                                                                                                                                                                                                                                                                                           |
| 3.1. *Student UID<br><i>Must be between 1 and 60.</i>                                                                                                            | <input type="text"/>                                                                                                                                                                                                                                                                                                      |
| 3.2. Student UID second entry.<br><i>Must be between 1 and 60.</i>                                                                                               | <input type="text"/>                                                                                                                                                                                                                                                                                                      |
| 3.3. Initials or name                                                                                                                                            | <input type="text"/>                                                                                                                                                                                                                                                                                                      |
| 3.4. Gender                                                                                                                                                      | <b>Select One:</b><br><input type="checkbox"/> Male <input type="checkbox"/> Female                                                                                                                                                                                                                                       |
| 3.5. Age (in years)<br><i>Must be between 6 and 14 years.</i>                                                                                                    | <input type="text"/>                                                                                                                                                                                                                                                                                                      |
| 3.6. How long have you lived in this community, in years?                                                                                                        | <input type="text"/>                                                                                                                                                                                                                                                                                                      |
| 4. Urination                                                                                                                                                     |                                                                                                                                                                                                                                                                                                                           |
| 4.1. When you are at school, where do you usually go to urinate?                                                                                                 | <b>Select One:</b><br><input type="checkbox"/> In the school toilet <input type="checkbox"/> Around the school compound<br><input type="checkbox"/> Outside the school compound <input type="checkbox"/> I wait/hold it <input type="checkbox"/> Other                                                                    |
| <b>ANSWER ONLY IF Question #4.1 is equal to "Other"</b>                                                                                                          | <input type="text"/>                                                                                                                                                                                                                                                                                                      |
| 4.2. Specify "other" options not mentioned above.                                                                                                                | <input type="text"/>                                                                                                                                                                                                                                                                                                      |
| 5. Defecation                                                                                                                                                    |                                                                                                                                                                                                                                                                                                                           |
| 5.1. When you are at school, where do you usually go to defecate?                                                                                                | <b>Select One:</b><br><input type="checkbox"/> In the school toilet <input type="checkbox"/> Around the school compound<br><input type="checkbox"/> Outside the school compound <input type="checkbox"/> I wait/hold it <input type="checkbox"/> Other                                                                    |
| <b>ANSWER ONLY IF Question #5.1 is equal to "Other"</b>                                                                                                          | <input type="text"/>                                                                                                                                                                                                                                                                                                      |
| 5.2. Specify "other" options not mentioned above.                                                                                                                | <input type="text"/>                                                                                                                                                                                                                                                                                                      |
| 6. Water                                                                                                                                                         |                                                                                                                                                                                                                                                                                                                           |
| 6.1. If there are water bodies, which of the following activities do you perform?<br><i>Ask the child what kinds of activities he/she engages in with water.</i> | <b>Select Multiple:</b><br><input type="checkbox"/> Bathing <input type="checkbox"/> Washing <input type="checkbox"/> Fishing<br><input type="checkbox"/> Crossing the water <input type="checkbox"/> Fetching water <input type="checkbox"/> Playing<br><input type="checkbox"/> Swimming <input type="checkbox"/> Other |
| <b>ANSWER ONLY IF Question #6.1 includes "Other"</b>                                                                                                             | <input type="text"/>                                                                                                                                                                                                                                                                                                      |
| 6.2. Specify "other" options not mentioned above.                                                                                                                | <input type="text"/>                                                                                                                                                                                                                                                                                                      |
| 7. Is the child putting on any footwear (sandals, shoes, slippers, etc.)?<br><i>Observe if the child is wearing any form of shoes before responding.</i>         | <b>Select One:</b><br><input type="checkbox"/> Yes <input type="checkbox"/> No                                                                                                                                                                                                                                            |
| 8. Which samples were collected?<br><i>Leave blank if no samples were collected from this child.</i>                                                             | <b>Select Multiple:</b><br><input type="checkbox"/> Stool <input type="checkbox"/> Urine                                                                                                                                                                                                                                  |
| 9. Additional notes (optional).                                                                                                                                  | <input type="text"/>                                                                                                                                                                                                                                                                                                      |
| 10. Form end time                                                                                                                                                |                                                                                                                                                                                                                                                                                                                           |
